# Supplementary material for: Accumulation of bioactive metabolites in cultivated medical Cannabis
Source: PLoS One. 2018 Jul 23;13(7):e0201119. doi: 10.1371/journal.pone.0201119 (PMC6056047; doi:10.1371/journal.pone.0201119)
Supplement: S1 Table — The terpenoid and cannabinoid abundances are reported as % dry wt for 72 strains, listed alphabetically by strain name, rows 2–73. The relative abundances of the terpenoids (% of total terpenoid) of these same samples are presented in rows 78–168. The results are organized by terpenoid type detected following the hierarchical clustering. Representative pie charts for the terpenoid composition are provided for each of the four terpenoid types: pinene, myrcene, terpinolene, and caryophyllene-limonene. A key to the color code for the pie chart is provided. (XLSX) [file pone.0201119.s003.xlsx]

## Sheet: Supplemental Data 4 Manuscript
Supplemental Data		Absolute Analyte Abundances ( % dry wt)
Sample #	Indicated Strain	a-Pinene	Camphene	b-Pinene	β-Myrcene	3-Carene	a-Terpinene	d-Limonene	p-Cymene	Ocimene	g-Terpinene	Terpinolene	Linalool	Isopulegol	Geraniol	b-Caryophyllene	a-Humulene	Nerolidol	Guaiol	a-Bisabolol		d9-THC	CBD	CBC	CBN	THCV	CBG
1	8-Ball Kush	0.000620684	0.00017093	0.00113793	0.00259877	0	0	0.00573988	0	0	7.90849e-05	0	0.000837274	0.000466465	0	0.0029612	0.000952161	0.000293101	0.00143904	0.000374181		0.263	0.000531	0.00286	0.00106	0.0013	0.0158
2	9 Lb Hammer	0.0033226	9.02079e-05	0.0015374	0.00339376	0	0	0.00118167	6.6405e-05	0	6.90774e-05	0	0.000694116	0.000120933	0.00015639	0.00267852	0.000699202	0.000381284	0.000100344	0		0.155	0.000468	0.00223	0.000924	<0.01%	0.00193
3	97 Sage	0.00368581	0.000143724	0.00152188	0.00536827	0	0	0.00223835	0	0.000964903	0	0	0.000424802	0.000317356	0	0.00124705	0.000340595	0.000264117	0	0.000335867		0.281	0.000755	0.00281	0.000939	0.00174	0.0139
4	Adonis	0.000387216	0.000109118	0.000721205	0.00100331	0	0	0.0041444	0	0	0	0	0.00150883	0.000262164	0	0.00451644	0.00124683	0.000512359	8.07333e-05	0.000834482		0.205	0.000399	0.0031	0.00079	0.0111	0.00722
5	Alien Sour Apple	0.00147096	0	0.000913045	0.00427757	0	0	0.00120097	0	0.000187995	0	0	0.000222493	0.000190341	0	0.00172552	0.000464356	0.000239559	7.94222e-05	0.000343669		0.156	0.000274	0.00233	0.00094	0.0015	0.00276
6	Black Boss	0.000972915	0.000122712	0.000972485	0.00260244	0	0	0.0045391	0	0.00170267	0	0	0.000491304	0.000278496	0	0.00171622	0.000471115	0.000310889	0.000573459	0.00059532		0.232	0.000593	0.00261	0.00132	0.00178	0.00397
7	Blue Dream	0.00063899	0	0.00101546	0.00214614	0.000648443	0.000291301	0.00143359	0	0.00169776	0.000210281	0.00732483	0.000288684	0	0	0.003324	0.00100277	0.000352769	0.000137657	0		0.22	0.000856	0.00398	0.00157	0.00186	0.016
8	Blue Dream	0.000678751	0	0.00102328	0.00240503	0.000624684	0.000283187	0.00148069	0	0.00173605	0.000199489	0.00740414	0.000327966	0	0	0	0.00134809	0.000414124	0.000153603	5.87113e-05		0.24	0.000625	0.00424	0.00135	0.00192	0.0188
9	Blue Dream	0.00519562	6.68522e-05	0.00255632	0.00651171	0.000361028	0.000178163	0.00057368	0	0.000846748	0.000117299	0.00453322	0.000301116	0	0	0.00318355	0.000985862	0.000794443	0.000896692	0.00214782		0.214	0.000479	0.00278	0.00126	0.00071	<0.01%
10	Blue Dream	0.00434342	0	0.00209453	0.0051134	0.00029369	0.000136929	0.000428095	0	0.000618975	7.82161e-05	0.0036332	0.000215839	0	0	0.00327686	0.00105112	0.000799877	0.000917426	0.00222066		0.209	0.000417	0.00265	0.00178	0.000697	0.00161
11	Bob Marley	0.00114913	0	0.000489143	0.00737254	0	0	5.01761e-05	0	0.000820951	7.64298e-05	0	0.00073709	7.70745e-05	0	0.000709302	0.000159228	0.000263524	0.000521049	0		0.238	0.000506	0.00285	0.00104	0.00093	0.0102
12	Chemdawg	0.000266249	7.52359e-05	0.000551146	0.00325305	0	0	0.00293792	0	0	0	0	0.000307883	0.000432299	0	0.00475572	0.0017144	0.000638736	9.92225e-05	0		0.242	0.000547	0.0035	0.00146	0.00178	0.00336
13	Chemdawg #4	0.000421692	0.000122483	0.000846511	0.0075361	0	0	0.00506033	0	0	0	6.74616e-05	0.000528299	0.000377074	0	0.0111238	0.00432737	0.00100366	9.97577e-05	0.00137584		0.275	0.00064505	0.00338	0.00112	0.00176	0.00326
14	Chemdawg #4	0.000286027	7.69109e-05	0.000568037	0.00442926	0	0	0.00325424	0	0	8.90074e-05	5.53386e-05	0.000288217	0.000372593	7.36603e-05	0.00430734	0.00161456	0.000550521	8.04699e-05	0.000824194		0.213	0.000407	0.00286	0.00102	0.00153	<0.01%
15	Cookies and Cream	0.000370354	9.50565e-05	0.000590082	0.000427422	0	0	0.00327188	0	0	0	0	0.00109995	0.000243003	0	0.00268471	0.000870598	0.000293069	5.55573e-05	0.000251312		0.153	0.000162	0.0102	0.000697	0.00108	0.0228
16	Cosmic Lotus	0.00268618	6.0939e-05	0.000927829	0.00948326	0	0	0.000742601	0	0.000723068	0	0	0	7.58299e-05	0	0.00159611	0.000356578	0.000282484	0	0.000428491		0.18	0.000455	0.00203	0.000899	0.000706	0.00199
17	Dairy Queen	0.000431507	0	0.000671028	0.000975707	0.000317453	0.000114872	0.000301925	0	0.000312376	7.9714e-05	0.00243038	0.000229766	0	0	0.000805589	0.000175735	0.000133887	0.000313641	0.000423155		0.126	0.000223	0.00271	0.000794	0.000675	0.00488
18	Dark Shadow Haze	0.000560397	0	0.000751473	0.00191786	0.000405551	0.000114001	0.000549326	0	0.00113953	0.000121359	0.00363411	0.000498519	7.52051e-05	0	0.00199172	0.00047849	0.000547255	0.00011553	0.000438461		0.157	0.0001	0.00313	<0.01%	0.000621	<0.01%
19	FLO	0.000200927	5.4038e-05	0.000408418	0.00741663	0	0	0.00192691	0	0	7.65149e-05	0	0.000174415	0.000145322	0	0.00192352	0.000597839	0.000490812	5.43278e-05	0		0.246	0.000534	0.00257	0.000836	0.000872	0.00427
20	Goji OG	0.000449601	0.000129134	0.000932428	0.00567076	0	0	0.00285475	0	0	0	0	0.000914621	0.000427787	0.00010835	0.00232876	0.000558063	0.000268475	0.000752672	0.000469403		0.252	0.000475	0.00284	0.000914	0.000948	0.00397
21	Golden Cobra	0.0013144	0	0.000670416	0.00361083	0	0	0.000423257	0	0	0.000170985	0	0.000323913	0	0	0.00219518	0.000522196	0.000212199	0.000217785	0.000359578		0.136	0.0001	0.00126	<0.01%	0.000458	0.00242
22	Golden Sage	0.000632377	0	0.00100461	0.00387736	0.000606795	0.00025063	0.000505226	0	0.00133699	0.000154234	0.00605117	0.000427696	6.298e-05	0	0.0021941	0.000912385	0.000356585	6.2961e-05	0.000250457		0.239	0.000473	0.0026	0.000786	0.00227	0.00726
23	Gorilla Glue	0.000282387	7.5914e-05	0.000527405	0.00172592	0	0	0.00312853	0	0	0	0	0.000475658	0.000371118	0	0.00816893	0.00240371	0.00090603	0.000142741	0.00123411		0.28	0.00061498	0.0028	0.0021	0.00118	0.00394
24	Gorilla Glue #4	0.000276021	8.71032e-05	0.000552985	0.00118643	0	0	0.0023474	0	0	0	0	0.000244425	0.000260889	0.00027013	0.00581073	0.00181009	0.000692657	9.34316e-05	0.00116823		0.196	0.000314	0.00251	0.00099	0.000812	0.00243
25	Grape Stomper	0.0010334	0	0.000642331	0.00415897	0	0	0.000566889	0	0.000132396	9.74648e-05	0	0.000290334	0.000134383	6.56682e-05	0.00242277	0.000582387	0.000193316	7.52334e-05	0		0.199	0.00042	0.00233	0.000812	0.000484	0.00398
26	Grape Stomper	0.00117831	0	0.000752968	0.00482934	0	0	0.000683491	0	0.000124768	0.000165966	0	0.000378001	0.000179818	0	0.00257063	0.000619882	0.000290261	0	0		0.201	0.000406	0.00232	0.000989	0.000473	0.00388
27	Grizzly Kush	0.000467712	0	0.000718574	0.00110757	0.000489782	0.000141545	0.000672289	0	0.00162905	0.000164787	0.00514444	0.000309007	0	0.000113936	0.00160836	0.000403136	0.000374238	7.08233e-05	0.00010494		0.148	0.0001	0.00188	<0.01%	0.00599	<0.01%
28	Hash Plant	0.000410961	8.75564e-05	0.000580335	0.00115426	0	0	0.00260174	0	0.000405631	0	0	0.000772056	0.000337577	0.000356641	0.00320101	0.000862985	0.000526492	0.000899576	0		0.227	0.00047627	0.00498	0.00176	0.000788	0.00595
29	Hash Plant	0.000132993	0	0.000292792	0.006949	0	0	0.00135064	0	5.21235e-05	5.64722e-05	0	0	0.000162816	0.000225369	0.0022945	0.000596189	0.000570095	0.000660302	0.00120451		0.207	0.000421	0.00242	0.00116	0.000446	0.000148
30	Hemlock	0.000680439	0	0.00112576	0.000948686	0.000422306	0.000155809	0.000649575	0	0.000968711	0.000163382	0.00318183	0.000159532	0.000145682	0	0.0015917	0.000370478	0.000293646	6.64269e-05	5.90404e-05		0.218	0.000484	0.0023	0.000952	0.00134	0.00712
31	Jabberwocky	0.000493384	0.000137538	0.000917295	0.00234901	0	0	0.00363502	0	0	0	7.33886e-05	0.00143467	0.000389968	0.000378598	0.00341452	0.00145945	0.000495577	0.00114293	0.00171498		0.299	0.000598	0.00669	0.000984	0.00168	0.00643
32	Jabberwocky	0.000402709	0.000108697	0.000815818	0.00805536	0	0	0.00365129	0	0	0	0.000117337	0.000451402	0.000311507	0.000114346	0.00559879	0.00160832	0.00126594	0.00142498	0.0024884		0.268	0.000532	0.0047	0.00103	0.00183	0.00571
33	Jack Herer	0.000213443	0	0.000396643	0.00225553	0	0	0.00218662	6.247e-05	0	0.000139531	0	0	0.000148915	0	0.00115984	0.000390733	0.000529456	0.000569235	0.000462913		0.18	0.0001	0.00281	<0.01%	<0.01%	<0.01%
34	Kandy Kush	0.00012354	0	0.000180944	0.0021261	0	0	0.000312582	0	0.000131421	0	5.5827e-05	0.000197977	6.98555e-05	0	0.00164452	0.000391439	0.000363288	0.000142503	0		0.166	0.000362	0.00277	0.00181	0.000413	0.00021
35	Kush Puppy	0.00222785	0	0.00106554	0.00746678	0	0	0.000427049	0	5.33326e-05	0	0	0.000395593	6.43184e-05	0	0.00162399	0.000561934	0.000518988	0.000661668	0.00105279		0.179	0.000417	0.00212	0.000861	0.000402	0.00271
36	La Choco	0.000356146	0	0.00056972	0.0013224	0	0	0.00307082	0	0.000544589	0	0	0.000773599	0.000317198	0	0.00261591	0.000701152	0.00048617	0.000960715	0.00156592		0.228	0.000447	0.00483	0.00297	0.000884	0.00596
37	Lemon Balm	0.000279912	0	0.000398326	0.00074375	0	0	0.00223024	0	0.000280483	0	0	0.00030442	0.000206784	0	0.00222352	0.000610722	0.000483629	0.000909273	0.00146144		0.141	0.000504	0.00382	0.00155	0.000557	0.00286
38	Lemon Goji	0.000149275	0	0.00027718	0.00264767	0	0	0.000589572	0	0.000167372	0.000130789	0	0.000675995	9.78569e-05	0	0.00130852	0.000429423	0.000110228	0.000124223	0.000312132		0.157	0.0001	0.00453	0.000147	0.000187	0.00397
39	Lemon OG	0.00266834	7.22039e-05	0.000860263	0.0021059	0	0	0.000881619	0	0.000207532	0	0	0.00028266	0.00013007	0.000116466	0.000936913	0.000218738	0.000257952	9.93257e-05	0		0.181	0.001	0.00395	0.00246	0.00104	0.0104
40	Lemon Sherbet	0.000322986	0	0.000253999	0.000437281	0.000222415	0.000134345	0.000207637	0	0.00131399	0.000120293	0.00220985	7.9827e-05	0	0	0.00852816	0.00366727	0.000202211	0.00062908	0.000266763		0.202	0.0001	0.00644	0.00199	0.00128	0.0219
41	Lemon Skunk	0.000659364	5.73028e-05	0.00107361	0.00149874	0.000389603	0.000166369	0.000961759	0	0.000967517	0.00013783	0.00301186	0.000370266	0.00018178	0	0.000883444	0.000262617	0.000273608	6.19595e-05	0.000274322		0.236	0.000516	0.00404	0.000945	0.000693	0.0131
42	Lemon Skunk	0.000492685	0.000134992	0.000941616	0.00334225	0	0	0.00444202	0	0	9.48762e-05	7.01206e-05	0.0022114	0.000398632	0	0.00562786	0.00156408	0.000530258	0.00018915	0.000378334		0.262	0.0001	0.00358	<0.01%	0.000577	<0.01%
43	Liberty Haze	0.00406009	9.92601e-05	0.00167904	0.0018594	0	0	0.000762416	0	0	0.000139084	0.000101841	0.00073044	0.000138449	0.000111572	0.0014909	0.000610706	0.000116216	0.000164187	0.000118822		0.196	0.0001	0.00256	0.00112	0.000926	<0.01%
44	Lohan	0.000420972	0	0.000698628	0.000333238	0.000217509	8.43306e-05	0.000289138	0	0.000384204	6.89649e-05	0.00136827	8.72831e-05	8.92701e-05	0	0.00112566	0.000243911	0.000158392	5.71999e-05	0.000283704		0.13	0.000564	0.00133	0.000721	0.000916	0.00382
45	Lucky Charms	0.00054994	0.000149872	0.00094249	0.000761374	0	0	0.00336159	0	0	9.52156e-05	0	0.000381006	0.000422235	0.00048616	0.00403911	0.00109877	0.000829016	0.000205807	0.00062772		0.254	0.0001	0.00422	0.000327	<0.01%	<0.01%
46	Maui Haze	0.000342515	9.8694e-05	0.000646391	0.00163128	0	0	0.00301227	0	0	0	0	0.000791526	0.000400445	0.000100943	0.00740168	0.00225963	0.000875529	8.89082e-05	0.0011872		0.263	0.000489	0.00279	0.00102	0.000968	0.00476
47	Moby Dick	0.000305468	7.8282e-05	0.000557463	0.00594411	0	0	0.00261716	0	0	0	0	0.000631167	0.000226637	0	0.00322291	0.000904493	0.000445051	0.000405765	0.00053549		0.245	0.00106	0.00273	0.00271	0.0012	0.00981
48	Moonshine Ghost Trane Haze	0.000272161	0	0.000464215	0.000200586	0	0	0.00179887	0	0	7.66159e-05	0	0.00105303	0.000189235	0	0.00266651	0.000872381	0.000130828	0.000815072	0.000553855		0.159	0.0001	0.00203	<0.01%	0.000174	0.00388
49	Nightmare Cookie	0.000230488	0	0.000396576	0.00169583	0	0	0.0014977	0	0	9.00106e-05	0	0.00096364	0.00014076	0	0.0046984	0.00121747	0.000214925	0.000264703	0.000155389		0.246	0.0001	0.00281	0.00134	0.000134	<0.01%
50	Orange Skunk	0.000110978	0	9.2943e-05	0.000885501	0	0	0.000356589	0	6.16423e-05	8.00082e-05	0	0.000288789	8.27445e-05	0	0.00526312	0.00225638	0.000475653	0.0008729	0.00026458		0.169	0.0001	0.00705	0.00335	0.000132	0.00953
51	Pineapple Skunk	0.00242526	0	0.000904752	0.00375656	0	0	0.00036999	0	0.000109462	0	0	0.000259185	0	0	0.00315935	0.00123118	0.00035115	0.00154361	0.00158721		0.135	0.0001	0.00349	0.000412	<0.01%	0.00229
52	Pipe Dream	0.00524099	0.000107645	0.00229363	0.00394508	0	0	0.00109631	0	0.00013144	9.52189e-05	0	0.000755869	0.000141286	0	0.004078	0.00164715	0.000558104	0.000825066	0		0.185	0.000463	0.00261	0.000776	0.000769	0.00403
53	Platinum Delight	0.000302642	7.31312e-05	0.000488869	0.00162962	0	0	0.00221281	0	0	0.000103985	7.78697e-05	0.00134336	0.000240232	0	0.00352441	0.00127321	0.000353605	0.000170653	0.000337174		0.198	0.0001	0.00242	0.000112	0.000166	<0.01%
54	Purple Eclipse	0.000309741	8.70975e-05	0.000583613	0.00309271	0	0	0.00372531	0	0	0	0	0.00165761	0.000336758	7.99827e-05	0.00425951	0.00134138	0.0006139	0.000205829	8.66877e-05		0.229	0.000449	0.00246	0.00145	0.00114	0.00663
55	Rocket Fuel	0.000386246	0.000112689	0.000730362	0.00109347	0	0	0.00295039	0	0	0.000117284	0	0.000459079	0.000338506	0.000399646	0.0047021	0.00202174	0.000888297	0.00127076	0		0.228	0.000652	0.00297	0.000776	<0.01%	0.00575
56	Rollex OG	0.000693303	0.000194888	0.00103381	0.00247566	0	0	0.00467531	0	0.000180765	7.26503e-05	0	0.00113636	0.000418765	0	0.00228617	0.000921539	0.00059034	0.000176589	0.000613647		0.195	0.0001	0.00491	0.000252	<0.01%	<0.01%
57	Rosetta Stone	0.000343767	9.96164e-05	0.000623369	0.00355727	0	0	0.00381316	0	0	6.44014e-05	6.81692e-05	0.00190931	0.000227113	7.24902e-05	0.00333106	0.000933739	0.00106824	0.000140465	0.00052858		0.213	0.0001	0.00197	<0.01%	0.000494	0.00795
58	Satori	0.00203381	0	0.00103351	0.00470729	0	0	0.000581451	0	0.000154258	9.6222e-05	0	9.79864e-05	9.81798e-05	0	0.000537066	0.000179375	0.000112322	0	7.72024e-05		0.16	0.0001	0.00174	<0.01%	<0.01%	<0.01%
59	Skunk Haze	0.00357844	0	0.00144224	0.00240752	0	0	0.000674597	0	6.91813e-05	7.92902e-05	0	0.000303746	0	0	0.00422534	0.00113663	0.000781006	0.000246474	0.000397584		0.0839	0.0001	0.00119	0.000999	<0.01%	0.000808
60	Skywalker OG	0.00109973	0	0.000399569	0.00634458	0	0	0.000742124	0	0.000634197	0	0	0.000835155	0	9.3823e-05	0.00281018	0.000934106	0.000629419	0.00118358	0		0.208	0.000471	0.00472	0.00173	0.00201	0.00167
61	Spectrum	8.05526e-05	0	0.000122103	0.00408907	0	0	0.000671081	0	0	0	0	0	0	0	0.0017288	0.000586286	0.000243316	0.000915103	0.0014251		0.00954	0.0856	0.00456	0.000511	0.000144	0.000879
62	Star Bud	0.000244301	0	0.000396787	0.00206335	0	0	0.00270942	0	0	7.284e-05	0	0.000485025	0.000120613	0	0.002893	0.000691871	0.000972313	6.34983e-05	0.000535027		0.148	0.0001	0.00272	<0.01%	<0.01%	0.00283
63	Star Killer	0.000169096	0	0.000285464	0.000495733	0	0	0.00121711	0	0	6.60881e-05	0	0.000285116	0.000175556	0	0.00259051	0.000732762	0.00040983	0.000141008	0.000791164		0.154	0.0001	0.00142	0.000275	<0.01%	<0.01%
64	Strawberry Fields	0.000319744	0	0.000553639	0.00665176	0	0	0.00201876	0	0.00197012	0	0	0.000468958	0.000220698	0	0.00218518	0.000542394	0.000384624	8.82028e-05	0		0.278	0.0004	0.00823	0.00142	0.00251	0.0167
65	Strawberry Fields	0.000362695	9.43057e-05	0.000712091	0.00796844	0	0	0.00354344	0	0.00202718	0	0	0.000339535	0.000259909	0.000291137	0.0024164	0.000617919	0.000340705	0.000108233	0		0.282	0.000393	0.00857	0.001	0.00229	0.0118
66	Sunset Sherbet	0.000240519	6.37395e-05	0.000427014	0.00217204	0	0	0.00196214	0	0	0	0	0.00102991	0.000192294	0	0.00419854	0.00164164	0.000482472	0.000129949	0.000469394		0.191	0.000382	0.00542	0.000894	0.000611	0.00525
67	Sunset Sherbet	0.000238219	0	0.000419725	0.00122131	0	0	0.0017449	0	0	0	0	0.00138992	0.000221757	0	0.00474482	0	0.000643672	0.000189613	0.00051895		0.21	0.000462	0.00503	0.00123	0.000688	0.00477
68	Tangerine Dream	0.00299982	0	0.00138482	0.00930758	0	0	0.000836251	0	0.000273584	9.74713e-05	0	0.000212029	0.00010145	0	0.00237063	0.000908511	0.000343088	0.000139731	0.000509312		0.171	0.0001	0.00408	0.000211	<0.01%	0.00144
69	The Sauce	0.000303931	0	0.000338697	0.00128145	0	0	0.00130083	0	0	0	0.000129295	0.000440212	0.000110332	0	0.00615881	0.00155265	0.000798161	0.000263614	0.000179779		0.149	0.0001	0.0015	0.000225	<0.01%	0.00305
70	Venom OG	0.000596661	9.0691e-05	0.000553833	0.000957183	0	0	0.0028689	0	0.000235481	0	0	0.000930185	0.000247244	0.000320942	0.00485334	0.00204862	0.000490951	0.000170216	0		0.163	0.000211	0.00478	0.00107	0.00107	0.00187
71	White Widow	0.000325333	0	0.000577986	0.00126331	0.000338568	0.000150653	0.000419577	0	0.00128754	0.000111974	0.00386025	0.000226735	0	0	0.00119773	0.000295612	0.000151991	0.000804986	0		0.161	0.00078694	0.000451	0.00124	0.000822	<0.01%
72	Wonder Woman	0.000221864	0	0.000162248	0.00820835	0	0	0.000206314	0	0.00119023	0	0	0.000479169	0	0	0.00191318	0.000616488	9.59902e-05	0.000644451	0.00070366		0.163	0.0011	0.0022	0.000868	0.000986	0.0313
Supplemental Data		Relative Analyte Abundances (Terpenes & Cannabinoids). Grouped according to Terptype.
Terptype:	PIN (Pinene)
Sample #	Indicated Strain	a-Pinene	Camphene	b-Pinene	Myrcene	3-Carene	a-Terpinene	d-Limonene	p-Cymene	Ocimene	g-Terpinene	Terpinolene	Linalool	Isopulegol	Geraniol	b-Caryophyllene	a-Humulene	Nerolidol	Guaiol	a-Bisabolol		d9-THC	CBD	CBC	CBN	THCV	CBG
9	Blue Dream	0.177627	0.00228554	0.0873952	0.222622	0.0123428	0.00609101	0.0196129	0	0.0289485	0.00401021	0.154981	0.0102945	0	0	0.108839	0.0337045	0.0271603	0.030656	0.0734293		0.976148	0.00218493	0.0126808	0.00574741	0.00323862	0
10	Blue Dream	0.172206	0	0.0830431	0.202734	0.0116441	0.00542891	0.0169729	0	0.0245408	0.00310107	0.144047	0.0085575	0	0	0.129919	0.0416742	0.0317132	0.0363737	0.0880438		0.966903	0.00192918	0.0122598	0.00823487	0.00322455	0.00744839
51	Pineapple Skunk	0.154498	0	0.0576359	0.239306	0	0	0.0235697	0	0.00697309	0	0	0.016511	0	0	0.201262	0.0784305	0.0223695	0.0983336	0.101111		0.955468	0.000707754	0.0247006	0.00291595	0	0.0162076
59	Skunk Haze	0.233244	0	0.0940059	0.156923	0	0	0.0439704	0	0.00450926	0.00516816	0	0.0197983	0	0	0.275409	0.0740858	0.0509062	0.0160652	0.0259146		0.964401	0.00114946	0.0136786	0.0114832	0	0.00928768
2	9 Lb Hammer	0.229273	0.00622471	0.106087	0.234183	0	0	0.0815397	0.00458221	0	0.00476662	0	0.0478968	0.00834486	0.0107915	0.184829	0.0482477	0.0263101	0.00692412	0		0.965419	0.00291494	0.0138896	0.00575514	0	0.012021
52	Pipe Dream	0.250576	0.00514657	0.10966	0.188618	0	0	0.0524153	0	0.00628422	0.00455249	0	0.0361387	0.00675499	0	0.194972	0.0787515	0.0266834	0.039447	0		0.955342	0.00239094	0.0134781	0.00400727	0.00397112	0.020811
3	97 Sage	0.218707	0.00852827	0.0903045	0.31854	0	0	0.132818	0	0.0572551	0	0	0.0252067	0.0188311	0	0.073997	0.0202101	0.0156721	0	0.0199295		0.933108	0.00250711	0.00933108	0.00311811	0.00577797	0.0461573
39	Lemon OG	0.301917	0.00816973	0.097337	0.238279	0	0	0.0997534	0	0.0234818	0	0	0.0319824	0.0147171	0.0131779	0.10601	0.0247498	0.0291867	0.0112385	0		0.905679	0.00500375	0.0197648	0.0123092	0.0052039	0.052039
43	Liberty Haze	0.333275	0.00814782	0.137824	0.152629	0	0	0.0625833	0	0	0.0114168	0.00835966	0.0599585	0.0113647	0.00915843	0.122381	0.0501301	0.00953968	0.0134774	0.0097536		0.976553	0.000498241	0.012755	0.0055803	0.00461371	0
(Note: a & b-pinene combined in pie chart)
Terptype:	MYR (Myrcene)
Sample #	Indicated Strain	a-Pinene	Camphene	b-Pinene	Myrcene	3-Carene	a-Terpinene	d-Limonene	p-Cymene	Ocimene	g-Terpinene	Terpinolene	Linalool	Isopulegol	Geraniol	b-Caryophyllene	a-Humulene	Nerolidol	Guaiol	a-Bisabolol		d9-THC	CBD	CBC	CBN	THCV	CBG
35	Kush Puppy	0.138206	0	0.066101	0.463204	0	0	0.0264921	0	0.00330851	0	0	0.0245408	0.00399001	0	0.100745	0.0348598	0.0321956	0.0410468	0.0653101		0.964908	0.00224786	0.011428	0.00464126	0.002167	0.0146084
68	Tangerine Dream	0.153961	0	0.0710737	0.477697	0	0	0.0429193	0	0.0140413	0.00500256	0	0.0108821	0.00520678	0	0.121669	0.0466279	0.0176085	0.00717146	0.0261396		0.967025	0.000565512	0.0230729	0.00119323	0	0.00814337
16	Cosmic Lotus	0.154704	0.00350963	0.053436	0.546165	0	0	0.0427683	0	0.0416433	0	0	0	0.00436723	0	0.0919238	0.0205362	0.016269	0	0.0246779		0.967326	0.00244518	0.0109093	0.00483126	0.00379407	0.0106943
58	Satori	0.209483	0	0.106452	0.484854	0	0	0.0598899	0	0.0158887	0.00991094	0	0.0100927	0.0101126	0	0.0553182	0.0184758	0.0115693	0	0.00795191		0.988631	0.000617894	0.0107514	0	0	0
11	Bob Marley	0.0924809	0	0.0393656	0.593333	0	0	0.00403811	0	0.0660691	0.00615098	0	0.0593201	0.00620286	0	0.0570837	0.0128145	0.0212081	0.0419334	0		0.93876	0.00199585	0.0112415	0.00410214	0.00366826	0.0402326
72	Wonder Woman	0.0153624	0	0.0112345	0.568369	0	0	0.0142857	0	0.0824151	0	0	0.0331789	0	0	0.132474	0.0426873	0.00664662	0.0446235	0.0487233		0.817231	0.00551506	0.0110301	0.00435188	0.0049435	0.156928
5	Alien Sour Apple	0.12999	0	0.0806869	0.378014	0	0	0.106131	0	0.0166133	0	0	0.019662	0.0168206	0	0.152487	0.0410357	0.0211701	0.00701864	0.0303705		0.952358	0.00167273	0.0142243	0.00573857	0.00915729	0.0168494
21	Golden Cobra	0.131168	0	0.0669029	0.360336	0	0	0.0422381	0	0	0.0170631	0	0.0323243	0	0	0.219063	0.0521115	0.021176	0.0217334	0.0358833		0.96978	0.000713073	0.00898473	0	0.00326588	0.0172564
25	Grape Stomper	0.0994081	0	0.061789	0.400072	0	0	0.0545319	0	0.0127359	0.00937562	0	0.0279287	0.0129269	0.00631695	0.233059	0.0560227	0.018596	0.00723708	0		0.961232	0.00202873	0.0112546	0.00392221	0.00233787	0.0192246
26	Grape Stomper	0.100082	0	0.0639548	0.410189	0	0	0.0580537	0	0.0105974	0.0140967	0	0.0321062	0.0152732	0	0.218342	0.0526509	0.0246539	0	0		0.96141	0.00194195	0.0110969	0.00473052	0.00226242	0.0185586
34	Kandy Kush	0.0215227	0	0.0315233	0.370401	0	0	0.0544569	0	0.0228957	0	0.00972598	0.0344909	0.01217	0	0.286502	0.0681951	0.0632906	0.0248263	0		0.967563	0.00210999	0.0161455	0.0105499	0.00240725	0.00122403
38	Lemon Goji	0.0212636	0	0.039483	0.377148	0	0	0.0839818	0	0.0238413	0.0186304	0	0.0962924	0.0139393	0	0.186393	0.0611693	0.0157014	0.017695	0.0444618		0.946159	0.000602649	0.0273	0.000885894	0.00112695	0.0239252
60	Skywalker OG	0.0700176	0	0.0254398	0.403947	0	0	0.0472496	0	0.0403781	0	0	0.0531727	0	0.00597353	0.178919	0.0594728	0.0400739	0.0753561	0		0.951505	0.00215461	0.0215918	0.00791396	0.00919483	0.00763949
19	FLO	0.014917	0.00401182	0.0303212	0.550617	0	0	0.143056	0	0	0.00568053	0	0.0129487	0.0107888	0	0.142804	0.044384	0.0364383	0.00403334	0		0.964396	0.00209344	0.0100752	0.00327738	0.00341851	0.0167397
64	Strawberry Fields	0.0207571	0	0.035941	0.431818	0	0	0.131054	0	0.127896	0	0	0.0304437	0.0143272	0	0.141857	0.0352111	0.024969	0.00572594	0		0.904771	0.00130183	0.0267851	0.00462149	0.00816898	0.0543514
65	Strawberry Fields	0.0190072	0.00494213	0.0373174	0.417589	0	0	0.185696	0	0.106235	0	0	0.0177935	0.0136206	0.0152572	0.126633	0.0323823	0.0178548	0.00567198	0		0.921409	0.00128409	0.0280017	0.00326741	0.00748236	0.0385554
29	Hash Plant	0.00914179	0	0.0201262	0.477667	0	0	0.0928414	0	0.00358292	0.00388184	0	0	0.0111918	0.0154916	0.157722	0.0409814	0.0391877	0.0453885	0.0827964		0.978284	0.00198965	0.0114369	0.00548217	0.0021078	0.000699449
61	Spectrum	0.00816845	0	0.0123819	0.414654	0	0	0.0680512	0	0	0	0	0	0	0	0.17531	0.0594524	0.0246735	0.0927962	0.144513		0.0942371	0.845566	0.0450442	0.00504771	0.00142245	0.00868285
32	Jabberwocky	0.0152455	0.004115	0.0308848	0.304955	0	0	0.138228	0	0	0	0.00444206	0.0170889	0.0117928	0.00432883	0.211956	0.0608867	0.0479253	0.0539462	0.0942044		0.951022	0.00188785	0.0166784	0.00365505	0.00649392	0.0202625
20	Goji OG	0.0283395	0.00813963	0.0587734	0.357443	0	0	0.179942	0	0	0	0	0.057651	0.0269645	0.0068296	0.146788	0.0351761	0.0169227	0.0474429	0.0295877		0.964974	0.0018189	0.0108751	0.00349994	0.00363014	0.0152022
47	Moby Dick	0.0192433	0.00493146	0.035118	0.374456	0	0	0.164871	0	0	0	0	0.039761	0.0142772	0	0.203031	0.0569795	0.0280365	0.0255616	0.0337337		0.933298	0.00403794	0.0103996	0.0103234	0.00457125	0.03737
Terptype:	TERP (Terpinolene)
Sample #	Indicated Strain	a-Pinene	Camphene	b-Pinene	Myrcene	3-Carene	a-Terpinene	d-Limonene	p-Cymene	Ocimene	g-Terpinene	Terpinolene	Linalool	Isopulegol	Geraniol	b-Caryophyllene	a-Humulene	Nerolidol	Guaiol	a-Bisabolol		d9-THC	CBD	CBC	CBN	THCV	CBG
44	Lohan	0.0712223	0	0.118198	0.056379	0.0367993	0.0142675	0.0489179	0	0.0650018	0.0116679	0.231491	0.014767	0.0151032	0	0.190445	0.0412662	0.0267977	0.00967739	0.0479985		0.94648	0.00410627	0.00968322	0.00524932	0.00666905	0.027812
22	Golden Sage	0.0338413	0	0.053761	0.207495	0.0324723	0.0134123	0.0270369	0	0.0715484	0.00825373	0.323824	0.0228879	0.00337034	0	0.117416	0.0488257	0.0190825	0.00336932	0.013403		0.946951	0.00187409	0.0103016	0.00311424	0.00899405	0.0287651
17	Dairy Queen	0.0559183	0	0.0869575	0.12644	0.0411383	0.0148861	0.039126	0	0.0404803	0.01033	0.314949	0.0297751	0	0	0.104395	0.0227733	0.0173502	0.0406442	0.0548361		0.931388	0.00164841	0.0200322	0.00586922	0.00498958	0.0360728
41	Lemon Skunk	0.0587043	0.00510176	0.0955852	0.133435	0.034687	0.0148121	0.085627	0	0.0861396	0.0122712	0.268151	0.0329654	0.0161842	0	0.0786545	0.0233812	0.0243598	0.00551636	0.0244234		0.924424	0.0020212	0.0158249	0.00370161	0.00271452	0.0513134
18	Dark Shadow Haze	0.0420126	0	0.0563374	0.143781	0.0304039	0.00854661	0.0411826	0	0.0854298	0.00909817	0.272447	0.0373736	0.00563807	0	0.149318	0.0358721	0.0410274	0.00866122	0.0328711		0.976059	0.000621693	0.019459	0	0.00386072	0
30	Hemlock	0.0619538	0	0.1025	0.0863776	0.0384509	0.0141864	0.0591436	0	0.0882009	0.0148759	0.289705	0.0145253	0.0132643	0	0.144924	0.0337319	0.0267364	0.00604815	0.00537561		0.947019	0.00210256	0.00999149	0.00413561	0.00582113	0.0309302
8	Blue Dream	0.037422	0	0.0564169	0.132598	0.034441	0.0156131	0.0816354	0	0.0957147	0.0109985	0.408216	0.0180819	0	0	0	0.0743252	0.0228321	0.00846866	0.00323696		0.899095	0.00234139	0.015884	0.00505741	0.00719276	0.0704291
71	White Widow	0.0295429	0	0.0524857	0.114719	0.0307446	0.0136805	0.0381009	0	0.116919	0.0101682	0.350542	0.0205893	0	0	0.108763	0.0268439	0.013802	0.0730992	0		0.979915	0.00478965	0.00274498	0.00754717	0.00500305	0
7	Blue Dream	0.031151	0	0.0495041	0.104625	0.0316118	0.014201	0.069888	0	0.0827662	0.0102513	0.357088	0.0140734	0	0	0.162046	0.0488852	0.0171976	0.00671081	0		0.900657	0.00350438	0.0162937	0.00642742	0.00761465	0.0655024
27	Grizzly Kush	0.0345936	0	0.0531482	0.0819194	0.036226	0.0104692	0.0497248	0	0.120491	0.0121882	0.380501	0.0228552	0	0.00842711	0.11896	0.0298173	0.02768	0.00523834	0.00776176		0.9489	0.000641149	0.0120536	0	0.0384048	0
Terptype:	C-L (Caryophyllene-Limonene)
CAR Subtype
Sample #	Indicated Strain	a-Pinene	Camphene	b-Pinene	Myrcene	3-Carene	a-Terpinene	d-Limonene	p-Cymene	Ocimene	g-Terpinene	Terpinolene	Linalool	Isopulegol	Geraniol	b-Caryophyllene	a-Humulene	Nerolidol	Guaiol	a-Bisabolol		d9-THC	CBD	CBC	CBN	THCV	CBG
40	Lemon Sherbet	0.0173685	0	0.0136588	0.0235147	0.0119603	0.00722438	0.0111656	0	0.0706592	0.00646873	0.118834	0.00429267	0	0	0.458599	0.197206	0.0108738	0.0338286	0.0143451		0.864319	0.000427881	0.0275555	0.00851483	0.00547687	0.0937059
50	Orange Skunk	0.0100054	0	0.00837941	0.0798336	0	0	0.0321488	0	0.00555745	0.00721325	0	0.0260362	0.00745995	0	0.474505	0.203427	0.0428832	0.0786976	0.0238536		0.893414	0.000528647	0.0372696	0.0177097	0.000697815	0.0503801
63	Star Killer	0.0229767	0	0.0387888	0.0673602	0	0	0.165381	0	0	0.00898005	0	0.0387416	0.0238545	0	0.351998	0.0995678	0.0556877	0.0191602	0.107503		0.988478	0.000641869	0.00911454	0.00176514	0	0
23	Gorilla Glue	0.0145243	0.00390455	0.0271264	0.0887708	0	0	0.160912	0	0	0	0	0.0244649	0.019088	0	0.42016	0.123632	0.0466006	0.00734169	0.0634749		0.963408	0.00211599	0.00963408	0.00722556	0.00406008	0.0135565
24	Gorilla Glue #4	0.0186494	0.00588514	0.0373625	0.0801616	0	0	0.158602	0	0	0	0	0.0165146	0.017627	0.0182514	0.392603	0.122299	0.0467995	0.00631272	0.0789317		0.965251	0.00154637	0.0123611	0.0048755	0.0039989	0.0119671
46	Maui Haze	0.0181831	0.00523937	0.0343149	0.0865999	0	0	0.159912	0	0	0	0	0.0420197	0.0212584	0.00535876	0.392933	0.119957	0.0464792	0.00471987	0.0630249		0.963275	0.00179103	0.0102188	0.00373589	0.00354544	0.0174342
67	Sunset Sherbet	0.0210201	0	0.0370361	0.107767	0	0	0.153968	0	0	0	0	0.122645	0.0195676	0	0.418677	0	0.0567969	0.0167312	0.0457915		0.94518	0.0020794	0.0226393	0.00553605	0.00309659	0.0214691
49	Nightmare Cookie	0.0199282	0	0.0342884	0.146623	0	0	0.129493	0	0	0.00778242	0	0.0833174	0.0121703	0	0.406229	0.105264	0.0185826	0.0228865	0.0134351		0.982491	0.000399387	0.0112228	0.00535178	0.000535178	0
69	The Sauce	0.023638	0	0.0263418	0.0996634	0	0	0.101171	0	0	0	0.0100558	0.034237	0.008581	0	0.478995	0.120756	0.0620762	0.0205023	0.0139822		0.968318	0.000649878	0.00974817	0.00146223	0	0.0198213
C-L-M Subtype
Sample #	Indicated Strain	a-Pinene	Camphene	b-Pinene	Myrcene	3-Carene	a-Terpinene	d-Limonene	p-Cymene	Ocimene	g-Terpinene	Terpinolene	Linalool	Isopulegol	Geraniol	b-Caryophyllene	a-Humulene	Nerolidol	Guaiol	a-Bisabolol		d9-THC	CBD	CBC	CBN	THCV	CBG
31	Jabberwocky	0.027355	0.00762561	0.0508582	0.130238	0	0	0.201539	0	0	0	0.00406893	0.0795436	0.0216212	0.0209908	0.189313	0.0809172	0.0274766	0.0633679	0.0950849		0.948057	0.00189611	0.0212124	0.00312003	0.00532687	0.020388
36	La Choco	0.0268095	0	0.0428866	0.0995459	0	0	0.231161	0	0.0409948	0	0	0.058234	0.0238776	0	0.196917	0.0527803	0.0365973	0.0723194	0.117877		0.93792	0.00183882	0.0198691	0.0122176	0.0036365	0.0245176
37	Lemon Balm	0.0276251	0	0.0393117	0.0734024	0	0	0.220108	0	0.0276815	0	0	0.0300439	0.020408	0	0.219445	0.0602736	0.0477304	0.0897382	0.144233		0.93818	0.00335349	0.0254174	0.0103133	0.00370614	0.0190297
33	Jack Herer	0.0250658	0	0.0465799	0.264879	0	0	0.256786	0.00733618	0	0.0163859	0	0	0.0174878	0	0.136206	0.0458858	0.0621768	0.0668483	0.0543623		0.984091	0.000546717	0.0153627	0	0	0
6	Black Boss	0.0633857	0.00799472	0.0633577	0.16955	0	0	0.295724	0	0.110929	0	0	0.0320086	0.0181441	0	0.111812	0.0306933	0.0202545	0.037361	0.0387853		0.957597	0.00244765	0.010773	0.0054484	0.00734708	0.0163865
1	8-Ball Kush	0.035125	0.00967307	0.0643966	0.147067	0	0	0.324825	0	0	0.00447548	0	0.0473821	0.0263976	0	0.167577	0.0538836	0.0165868	0.0814363	0.0211752		0.924263	0.0018661	0.0100509	0.00372517	0.0045686	0.0555261
56	Rollex OG	0.0448165	0.012598	0.0668277	0.160032	0	0	0.302222	0	0.011685	0.00469627	0	0.0734569	0.0270698	0	0.147783	0.0595702	0.0381608	0.0114151	0.0396674		0.973724	0.000499346	0.0245179	0.00125835	0	0
4	Adonis	0.0252635	0.0071193	0.0470543	0.0654597	0	0	0.270397	0	0	0	0	0.0984423	0.0171046	0	0.29467	0.0813483	0.0334283	0.00526736	0.0544449		0.900667	0.00175301	0.0136198	0.00347086	0.0487678	0.0317211
15	Cookies and Cream	0.0361215	0.0092711	0.0575522	0.0416876	0	0	0.319114	0	0	0	0	0.107281	0.0237007	0	0.261847	0.0849116	0.0285838	0.00541864	0.0245111		0.814094	0.000861982	0.0542729	0.00370865	0.00574655	0.121316
48	Moonshine Ghost Trane Haze	0.0299297	0	0.0510499	0.0220585	0	0	0.197823	0	0	0.00842548	0	0.115802	0.0208102	0	0.293237	0.095936	0.0143872	0.0896337	0.0609076		0.962563	0.000605386	0.0122893	0	0.00105337	0.023489
55	Rocket Fuel	0.0249665	0.00728408	0.0472098	0.0706807	0	0	0.19071	0	0	0.00758111	0	0.0296743	0.0218806	0.0258327	0.303938	0.130683	0.0574185	0.0821406	0		0.957388	0.00273779	0.0124712	0.00325848	0	0.0241446
70	Venom OG	0.0415379	0.00631366	0.0385563	0.0666365	0	0	0.199725	0	0.0163936	0	0	0.064757	0.0172124	0.0223431	0.337876	0.14262	0.0341787	0.01185	0		0.947669	0.00122674	0.0277905	0.00622089	0.00622089	0.010872
28	Hash Plant	0.0336941	0.00717862	0.0475808	0.094636	0	0	0.213313	0	0.0332571	0	0	0.0632997	0.0276774	0.0292405	0.262447	0.0707549	0.0431663	0.073755	0		0.942087	0.0019766	0.0206678	0.00730429	0.00327033	0.0246935
45	Lucky Charms	0.0394214	0.0107433	0.0675606	0.0545776	0	0	0.240969	0	0	0.00682534	0	0.0273117	0.0302671	0.0348494	0.289536	0.0787634	0.0594264	0.0147528	0.0449968		0.982033	0.000386627	0.0163157	0.00126427	0	0
14	Chemdawg #4	0.0169544	0.00455893	0.0336707	0.262546	0	0	0.192897	0	0	0.00527596	0.00328022	0.0170842	0.0220857	0.00436625	0.25532	0.0957036	0.0326324	0.0047699	0.0488545		0.973416	0.00186	0.0130703	0.00466143	0.00699214	0
12	Chemdawg	0.0177123	0.0050051	0.0366652	0.216411	0	0	0.195446	0	0	0	0	0.0204821	0.0287589	0	0.316376	0.114051	0.0424921	0.00660082	0		0.957858	0.00216508	0.0138533	0.00577881	0.0070454	0.0132992
13	Chemdawg #4	0.0128211	0.00372397	0.0257374	0.229128	0	0	0.153855	0	0	0	0.0020511	0.0160624	0.0114646	0	0.338208	0.131569	0.0305153	0.00303304	0.0418311		0.964354	0.00226202	0.0118528	0.00392755	0.00617186	0.011432
53	Platinum Delight	0.0249466	0.00602817	0.0402972	0.134329	0	0	0.182401	0	0	0.00857142	0.00641876	0.110733	0.0198022	0	0.290515	0.10495	0.0291475	0.0140669	0.0277931		0.986066	0.000498013	0.0120519	0.000557774	0.000826701	0
66	Sunset Sherbet	0.0184877	0.0048994	0.0328229	0.166956	0	0	0.150822	0	0	0	0	0.0791648	0.0147809	0	0.322725	0.126186	0.0370857	0.00998864	0.0360804		0.938312	0.00187662	0.0266264	0.00439189	0.00300162	0.0257913
42	Lemon Skunk	0.0241296	0.00661135	0.0461163	0.163689	0	0	0.217551	0	0	0.00464663	0.00343421	0.108305	0.0195233	0	0.275629	0.0766018	0.0259698	0.00926378	0.0185292		0.984012	0.000375577	0.0134457	0	0.00216708	0
54	Purple Eclipse	0.0189095	0.00531727	0.0356294	0.188809	0	0	0.227429	0	0	0	0	0.101196	0.0205589	0.00488291	0.260041	0.0818906	0.0374784	0.0125657	0.00529225		0.949699	0.00186207	0.010202	0.00601338	0.00472776	0.0274957
57	Rosetta Stone	0.0204858	0.00593635	0.0371478	0.211985	0	0	0.227234	0	0	0.00383781	0.00406235	0.11378	0.0135341	0.00431984	0.198505	0.0556434	0.0636586	0.0083706	0.0314992		0.95296	0.000447399	0.00881377	0	0.00221015	0.0355682
62	Star Bud	0.0217194	0	0.035276	0.183441	0	0	0.240879	0	0	0.00647579	0	0.0431208	0.010723	0	0.2572	0.0615103	0.0864428	0.00564527	0.0475662		0.963228	0.00065083	0.0177026	0	0	0.0184185
